# Supplementary material for: Mouse adult hematopoietic stem cells actively synthesize ribosomal RNA
Source: PubMed Central journal article supplement — RNA. 2018 Dec;24(12):1803–12. doi: 10.1261/rna.067843.118 (PMC6239186; doi:10.1261/rna.067843.118), 2018-12
Supplement: supp_067843.118_Supplemental_Material.pdf [file supp_067843.118_Supplemental_Material.pdf]

## Supplementary information

### Mouse adult hematopoietic stem cells actively synthesize ribosomal RNA

Léonard Jarzebowski<sup>1, 2</sup>, Marie Le Bouteiller<sup>1, 2</sup>, Sabrina Coqueran<sup>1, 2</sup>, Aurélien Raveux<sup>1, 2</sup>, Sandrine Vandormael-Pournin<sup>1, 2</sup>, Alexandre David<sup>3</sup>, Ana Cumano<sup>4</sup> and Michel Cohen-Tannoudji<sup>1, 2 #</sup>

<sup>1</sup> : Early Mammalian Development and Stem Cell Biology, Department of Developmental & Stem Cell Biology, Institut Pasteur, 25 rue du Dr. Roux, 75015, Paris, France

<sup>2</sup> : CNRS UMR 3738, Institut Pasteur, Paris 75015, France.

<sup>3</sup> : IGF, CNRS, INSERM, Univ. Montpellier, 34094 Montpellier, France

<sup>4</sup> : Lymphocyte Development Unit, Institut Pasteur, Paris 75015, France

# Correspondence:

Michel Cohen-Tannoudji : Early Mammalian Development and Stem Cell Biology, Department of Developmental & Stem Cell Biology, Institut Pasteur, 25 rue du docteur Roux, F-75015 Paris, France; E-mail: m-cohen@pasteur.fr; Phone: 33 1 45 68 84 86; Fax: 33 1 45 68 86 34; website: <https://research.pasteur.fr/en/team/group-michel-cohen-tannoudji/>.

**Running title:** Ribosome biogenesis in HSCs

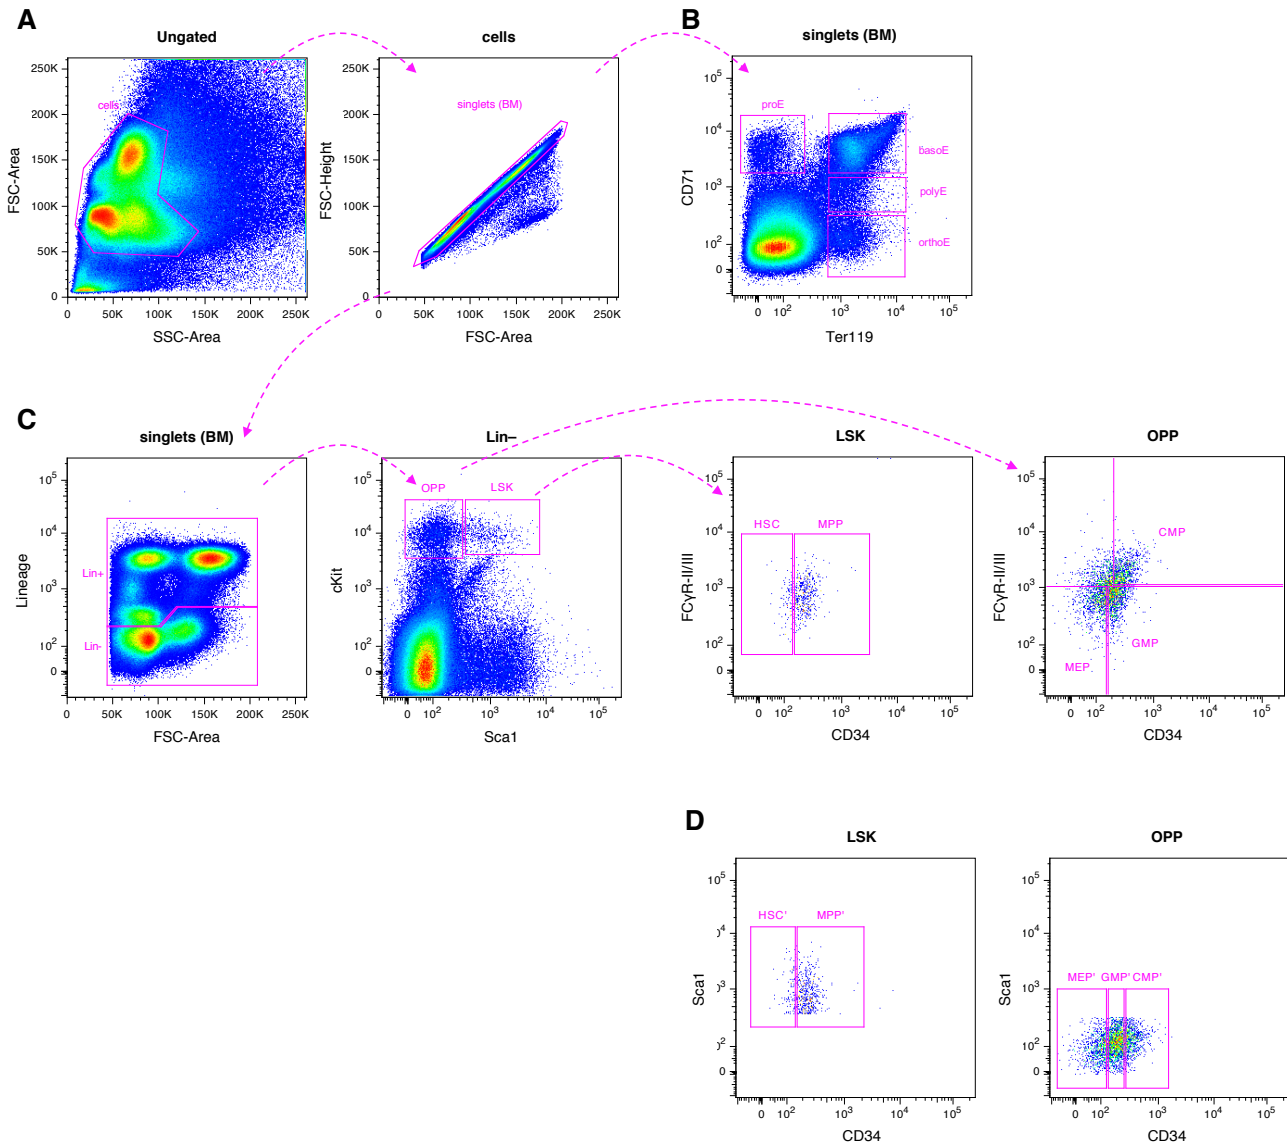

**Figure S1: Gating strategies for flow cytometry analyses**

**A.** For all flow cytometry analyses, cell debris and doublets were eliminated using forward and side scatter plots as indicated. **B.** For analysis of the erythroid lineage, singlets (BM) were plotted using CD71 and Ter119 and the indicated gate were drawn to separate pro-erythroblasts (proE;  $CD71^+ Ter119^{low}$ ), basophilic erythroblasts (basoE;  $CD71^+ Ter119^+$ ), late basophilic and polychromatophilic erythroblasts (polyE;  $CD71^{low} Ter119^+$ ) and orthochromatophilic erythroblasts (orthoE;  $CD71^- Ter119^+$ ). **C.** For analyses on the immature hematopoietic populations, singlets (BM) were plotted using Lineage markers and forward-scatter to separate  $Lin^+$  and  $Lin^-$  cells.  $Lin^-$  cells were then plotted using Sca1 and cKit to separate  $Lin^- Sca1^- cKit^+$  oligopotent progenitors (OPP) and  $Lin^- Sca1^+ cKit^+$  (LSK) population enriched for stem cells and multipotent progenitors. HSC and MPP were further isolated from the LSK population based on CD34 expression while CMP, GMP and MEP were isolated from the OPP population using FCγR-II/III and CD34 expression. **D.** For Flow-FISH experiments, FCγR-II/III couldn't be used and CMP, GMP and MEP populations were defined based on CD34 expression as indicated.

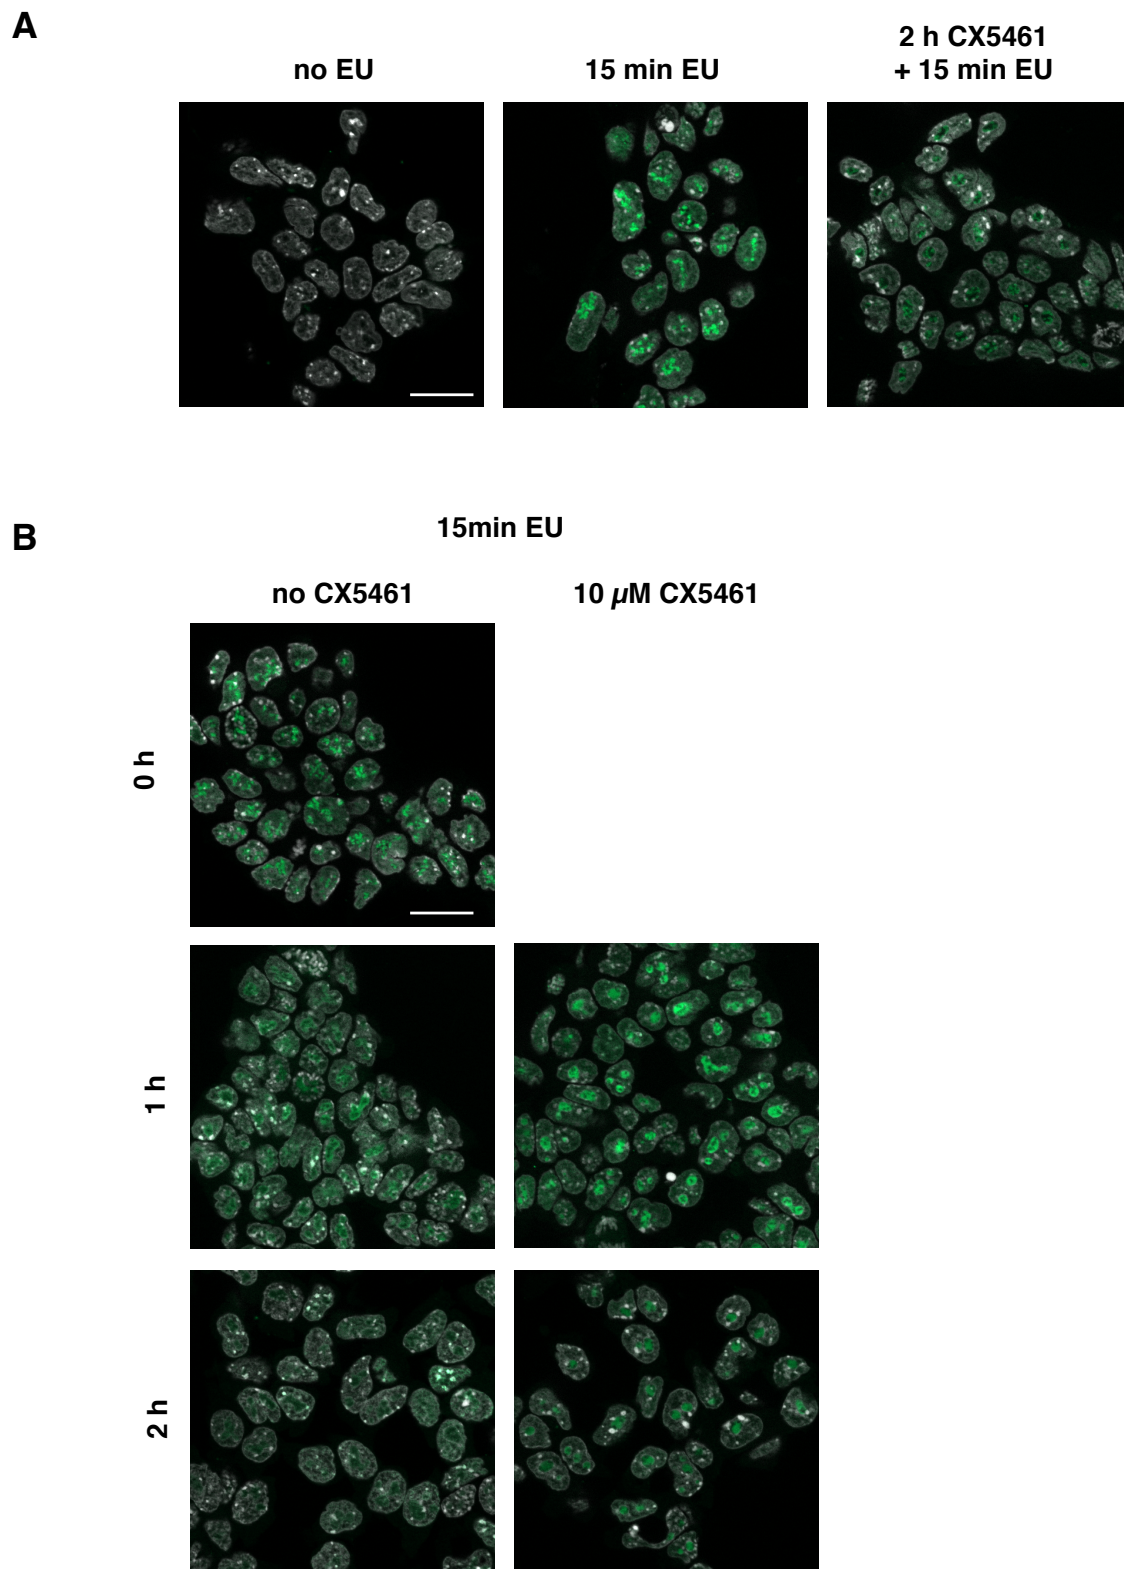

**Figure S2: CX-5461 treatment blocks processing of previously synthesized rRNA**

**A.** Embryonic stem cells were incubated in the presence or absence of 10  $\mu$ M CX-5461 for 2h, and then incubated for 15 min in the presence or absence of 1 mM EU. Cells incubated with neither compound were used as controls. **B.** Embryonic stem cells were incubated in the presence of 1 mM EU for 15 min, and were then incubated in the presence or absence of 10  $\mu$ M CX-5461 up to 2h. Cells were analyzed at the indicated time-points after EU incubation. EU staining (green) was revealed using Click-iT chemistry, and nuclei were stained with Hoechst (white). Bar: 10  $\mu$ m.

| <b>Antibody information</b> |                     |              |                      |
|-----------------------------|---------------------|--------------|----------------------|
| <b>Antigen</b>              | <b>Fluorochrome</b> | <b>Clone</b> | <b>Supplier</b>      |
| CD71                        | Biotin              | C2           | BD Biosciences       |
| B220                        | Biotin              | RA3-6B2      | BioLegend            |
| Nk1.1                       | Biotin              | PK136        | BD Biosciences       |
| Gr-1                        | Biotin              | RB6-8C5      | BD Biosciences       |
| Ter119                      | Biotin              | TER-119      | BD Biosciences       |
| CD3ε                        | Biotin              | 145-2C11     | BD Biosciences       |
| CD11c                       | Biotin              | N418         | BioLegend            |
| Mac1                        | Biotin              | M1/70        | BioLegend            |
| Sca-1                       | PeCy7               | D7           | BD Biosciences       |
| Sca-1                       | BV510               | D7           | DB                   |
| cKit                        | APC                 | 2B8          | BioLegend            |
| cKit                        | PeCy7               | 2B8          | BioLegend            |
| CD34                        | FITC                | RAM34        | eBioscience          |
| CD34                        | eFluor660           | RAM34        | eBioscience          |
| FCyR-II/III                 | PE                  | 2.4G2        | BD Biosciences       |
| Streptavidin                | Pacific Blue        | –            | Invitrogen           |
| Puromycin                   | Alexa647            | 2A4          | Seedhom et al., 2016 |

**Table S1: Antibodies**

List of antibodies used for surface marker staining and intra-cellular puromycin staining.

|                                                                                                        | Volume per well                                                       | Comments                                   |
|--------------------------------------------------------------------------------------------------------|-----------------------------------------------------------------------|--------------------------------------------|
| <b>Solution A</b><br>Formamide<br>2X SSC<br>tRNA (10mg/mL)<br>H2O (QS 21,25µL)<br>FISH probe (50ng/µL) | 5µL<br>2,5µL<br>2,5µL<br>8,75µL<br>2,5µL<br><b>final vol. 21,25µL</b> | SIGMA R1753                                |
| <b>Solution B</b><br>4X SSC, 20% dextran sulfate<br>BSA 10mg/mL<br>VRC 200mM                           | 25µL<br>1,25µL<br>2,5µL<br><b>final vol. 28,75µL</b>                  | SIGMA R3380                                |
| <b>Solution (A+B)</b>                                                                                  | <b>final vol. 50µL</b>                                                | heat solution A 5min at 95°C before mixing |

**Table S2: FISH staining buffer preparation**

For preparation of FISH staining buffer, solutions A and B were prepared separately as indicated. Solution A was heated for 5min at 95°C, and mixed with solution B for stainings.

**Supplementary References**

Seedhom, M. O., Hickman, H. D., Wei, J., David, A. and Yewdell, J. W. (2016). Protein Translation Activity: A New Measure of Host Immune Cell Activation. *The Journal of Immunology* 197, 1498–1506.
